# Supplementary material
Source: publisher figshare collection journal article supplement (https://karger.figshare.com/ndownloader/files/22797749)
Supplement: Supplementary file 1 [file 22797749]

**Supplementary Table 1: Characteristics of patients with resection w/ and w/o endoscopy (n=79)**

|  | **Total patients w/ resection** | **Patients w/o endoscopy** | **Patients w/ endoscopy** | ***p*** |
| --- | --- | --- | --- | --- |
| n | 79 | 36 (45.6%) | 43 (54.4%) |  |
| Female sex | 38 (48.1%) | 16 (44.4%) | 22 (51.2%) | ns |
| Age groups (years) |  |  |  | ns |
| 18-40 | 40 (50.6%) | 19 (52.8%) | 21 (48.8%) |  |
| 41-60 | 24 (30.4%) | 9 (25.0%) | 15 (34.9%) |  |
| 60+ | 15 (19.0%) | 8 (22.2%) | 7 (16.3%) |  |
| Type of residence (urban) | 61 (77.2%) | 27 (75.0%) | 34 (79.1%) | ns |
| Chronic condition (0-1) | 21 (26.6%) | 12 (33.3%) | 9 (20.9%) | ns |
| 2-4 chronic conditions | 49 (62.0%) | 21 (58.3%) | 28 (65.1%) |  |
| 5+ chronic conditions | 9 (11.4%) | 3 (8.3%) | 6 (14.0%) |  |
| Health Insurance plan |  |  |  |  |
| Managed care | 39 (49.4%) | 15 (41.7%) | 24 (55.8%) | ns |
| Higher deductible | 9 (11.4%) | 4 (11.1%) | 5 (11.6%) | ns |
| Supplementary hospital  insurance | 11 (13.9%) | 3 (8.3%) | 8 (18.6%) | ns |

**Supplementary Table 2: Characteristics of patients with resection w/ and w/o anti-TNF and/or azathioprine (n=79)**

|  | **Total patients w/ resection** | **Patients w/o TNF/AZ** | **Patients w/ TNF/AZ** | ***p*** |
| --- | --- | --- | --- | --- |
| n | 79 | 29 (36.7%) | 50 (63.3%) |  |
| Female sex | 38 (48.1%) | 19 (65.5%) | 19 (38.0%) | 0.022 |
| Age groups (years) |  |  |  | ns |
| 18-40 | 40 (50.6%) | 11 (37.9%) | 29 (58.0%) |  |
| 41-60 | 24 (30.4%) | 8 (27.6%) | 16 (32.0%) |  |
| 60+ | 15 (19.0%) | 10 (34.5%) | 5 (10.0%) |  |
| Type of residence (urban) | 61 (77.2%) | 23 (79.3%) | 38 (76.0%) | ns |
| Chronic condition (0-1) | 21 (26.6%) | 9 (31.0%) | 12 (24.0%) | ns |
| 2-4 chronic conditions | 49 (62.0%) | 17 (58.6%) | 32 (64.0%) |  |
| 5+ chronic conditions | 9 (11.4%) | 3 (10.3%) | 6 (12.0%) |  |
| Health Insurance plan |  |  |  |  |
| Managed care | 39 (49.4%) | 14 (48.3%) | 25 (50.0%) | ns |
| Higher deductible | 9 (11.4%) | 3 (10.3%) | 6 (12.0%) | ns |
| Supplementary hospital  insurance | 11 (13.9%) | 5 (17.2%) | 6 (12.0%) | ns |

**Supplementary Table 3: Linear regression model evaluating factors for total costs during the 1-year follow-up period.**

| **Total health care costs** | **Exp(β)** | **95% CI** | **p-value** |
| --- | --- | --- | --- |
| CD with resection | 1.40 | 1.19-1.66 | <0.001 |
| Age 18-40 | 1.00 |  |  |
| Age 41-60 | 0.96 | 0.84-1.10 | Ns |
| Age 60+ | 0.83 | 0.72-0.96 | 0.013 |
| Female sex | 0.97 | 0.87-1.08 | Ns |
| 2-4 chronic conditions | 2.13 | 1.85-2.44 | <0.001 |
| 5+ chronic conditions | 3.55 | 3.01-4.18 | <0.001 |

R2 of the linear multivariate regression model with log transformation of costs = 0.281

No significant impact of further variables (supplementary hospital insurance, urban region, managed care).

**Supplementary Table 4: Linear regression model evaluating factors for inpatient costs during the 1-year follow-up period.**

| **Total health care costs** | **Exp(β)** | **95% CI** | **p-value** |
| --- | --- | --- | --- |
| CD with resection | 2.17 | 1.78-2.65 | <0.001 |
| Age 18-40 | 1.00 |  |  |
| Age 41-60 | 1.19 | 1.01-1.39 | 0.038 |
| Age 60+ | 1.43 | 1.20-1.69 | <0.001 |
| Female sex | 1.03 | 0.91-1.18 | Ns |
| 2-4 chronic conditions | 1.39 | 1.18-1.63 | <0.001 |
| 5+ chronic conditions | 2.24 | 1.85-2.72 | <0.001 |

R2 of the linear multivariate gression model with log transformation of costs = 0.211

No significant impact of further variables (supplementary hospital insurance, urban region, managed care).
